# Supplementary material for: The involvement of the synaptic vesicle cycle in homocysteine induced neurotoxicity in vitro and in vivo
Source: Springer Nature journal article supplement (doi:10.1038/s41598-025-98306-3), 2025-05-29
Supplement: MOESM1 [file 41598_2025_98306_MOESM1_ESM.pdf]

Figure 4

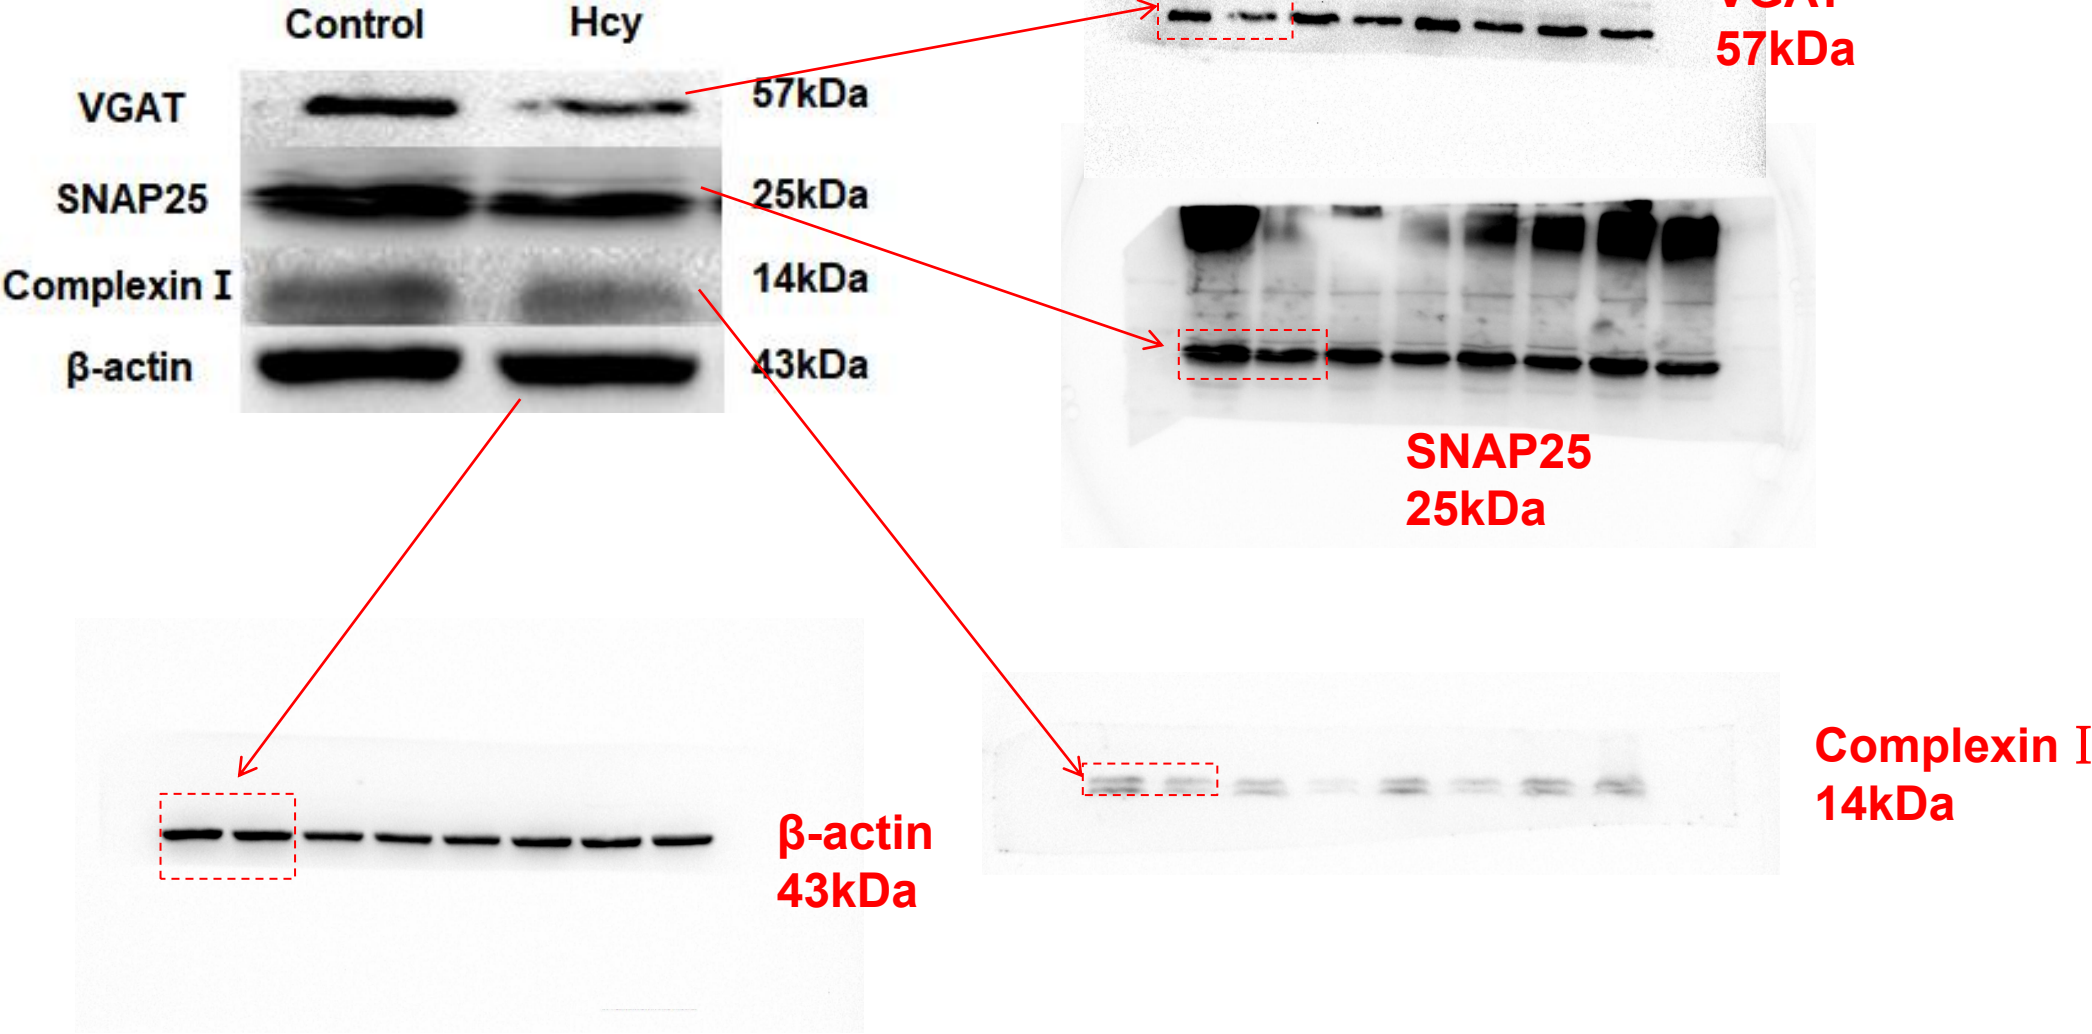

**Figure 4**

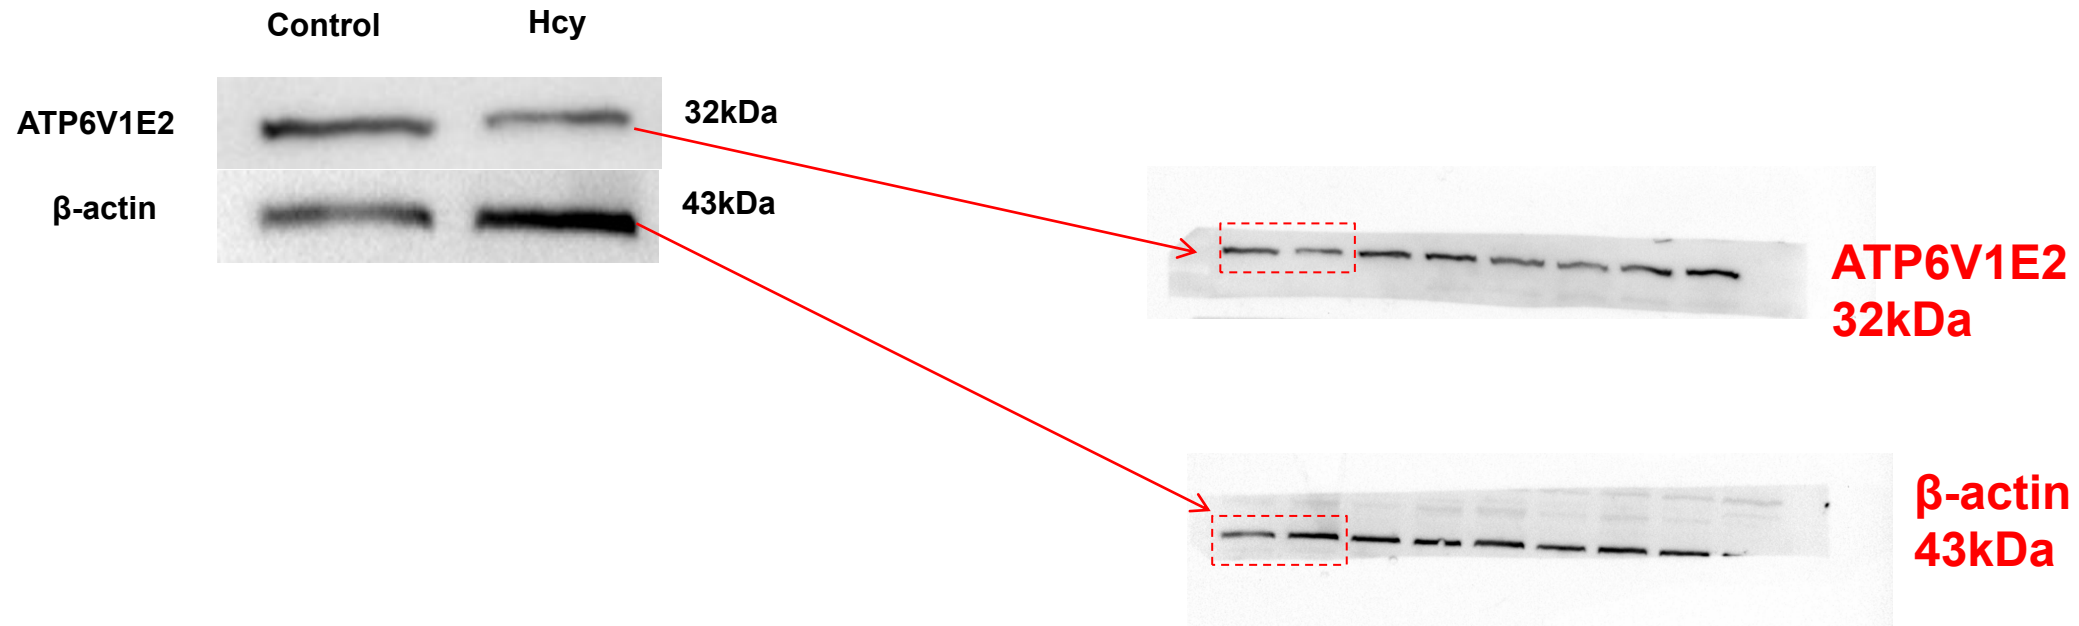

The samples derive from the same experiment or parallel experiments and that gels/blots were processed in parallel.

Figure 5

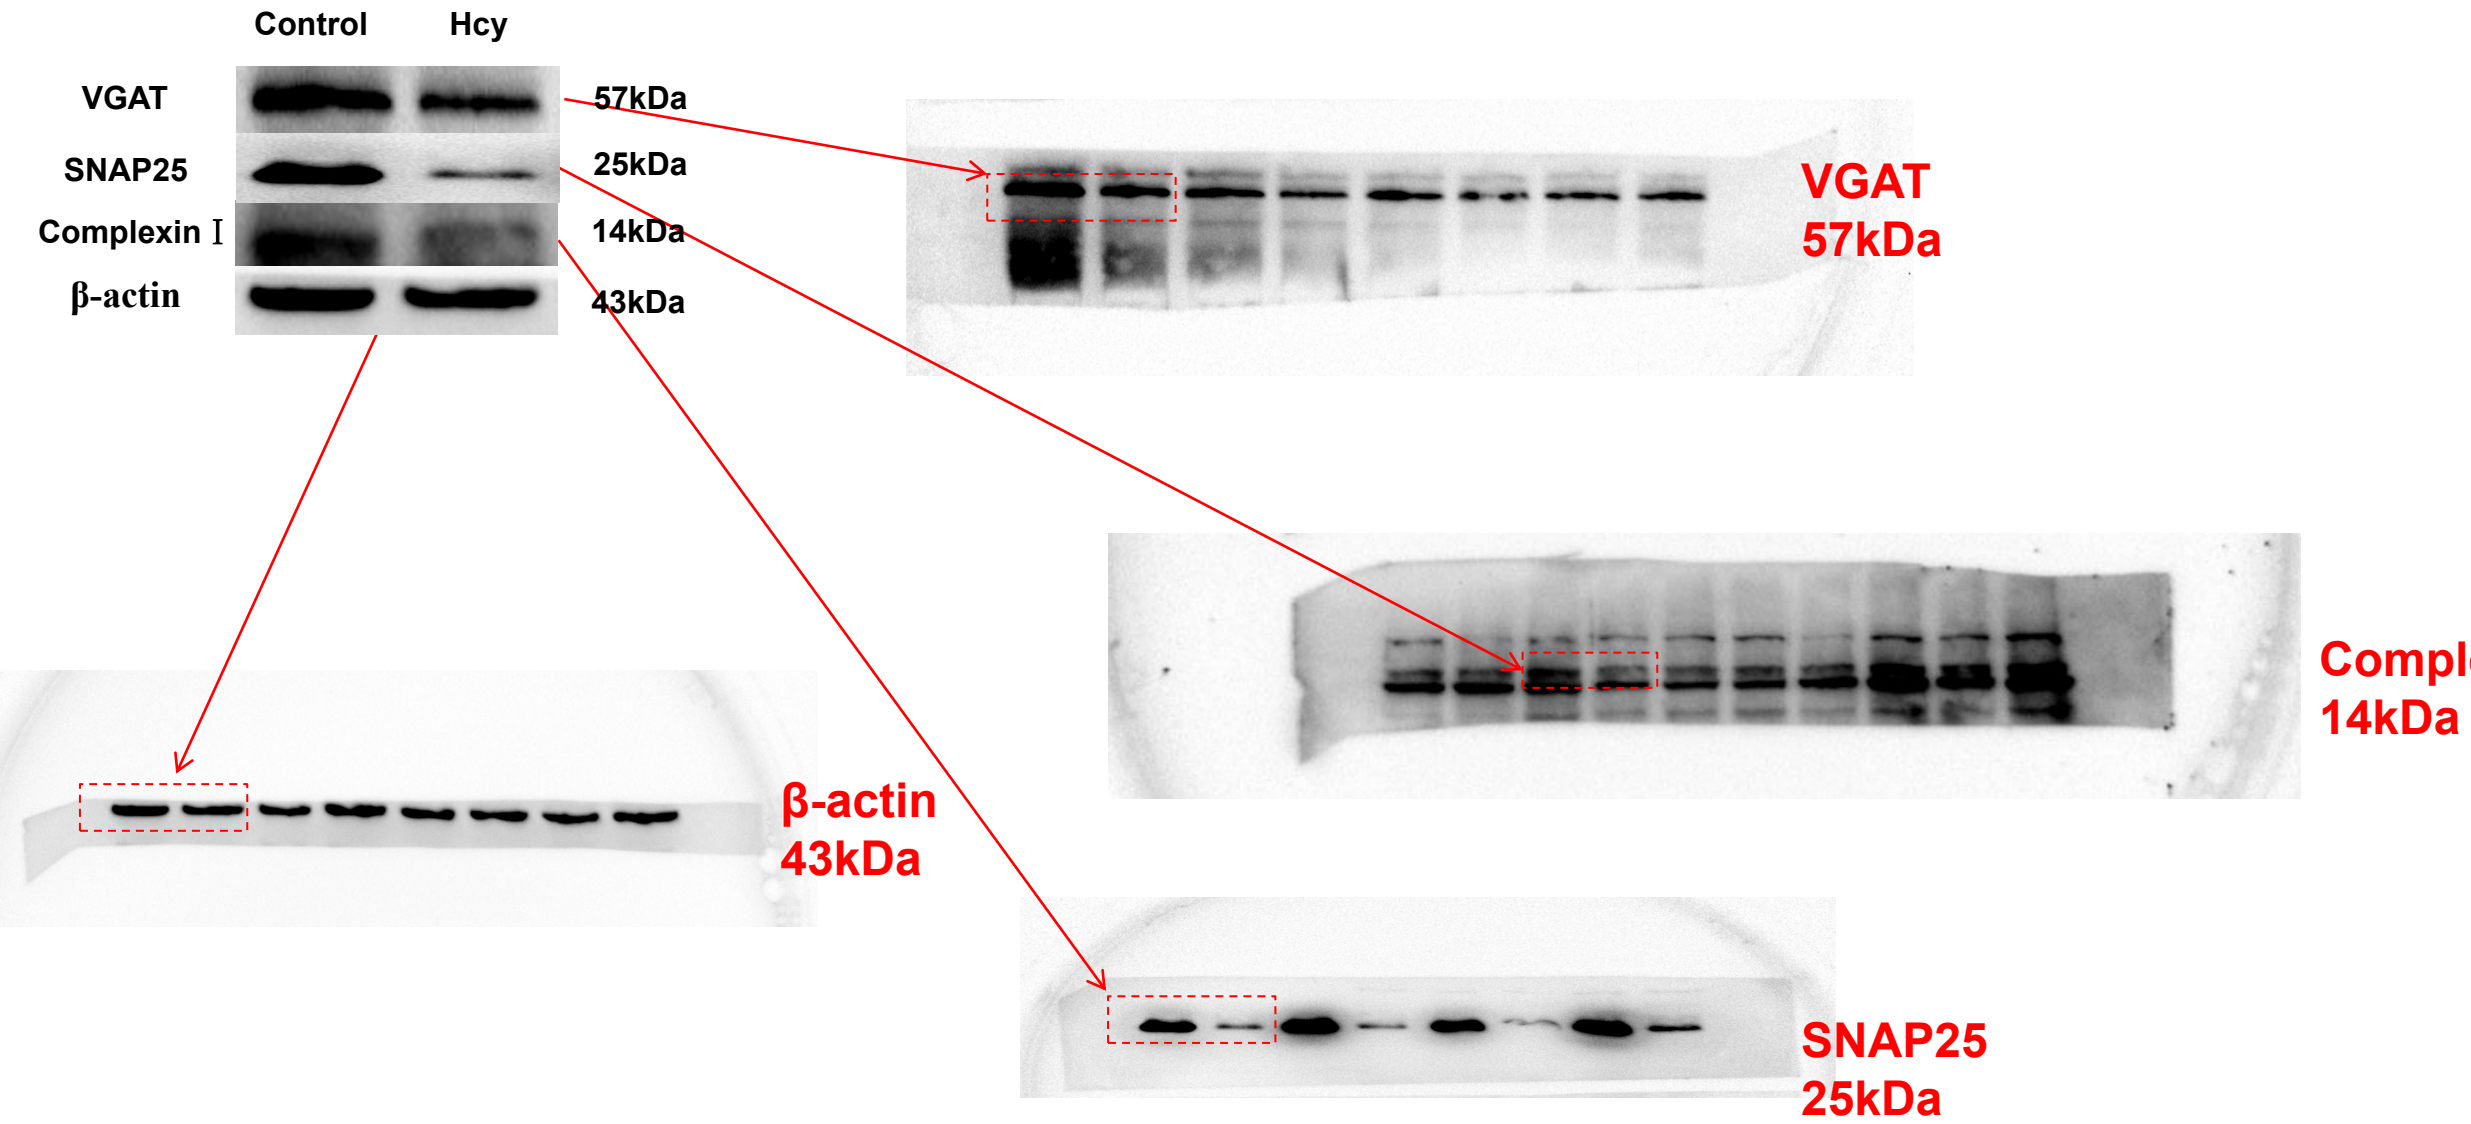

**Figure 5**

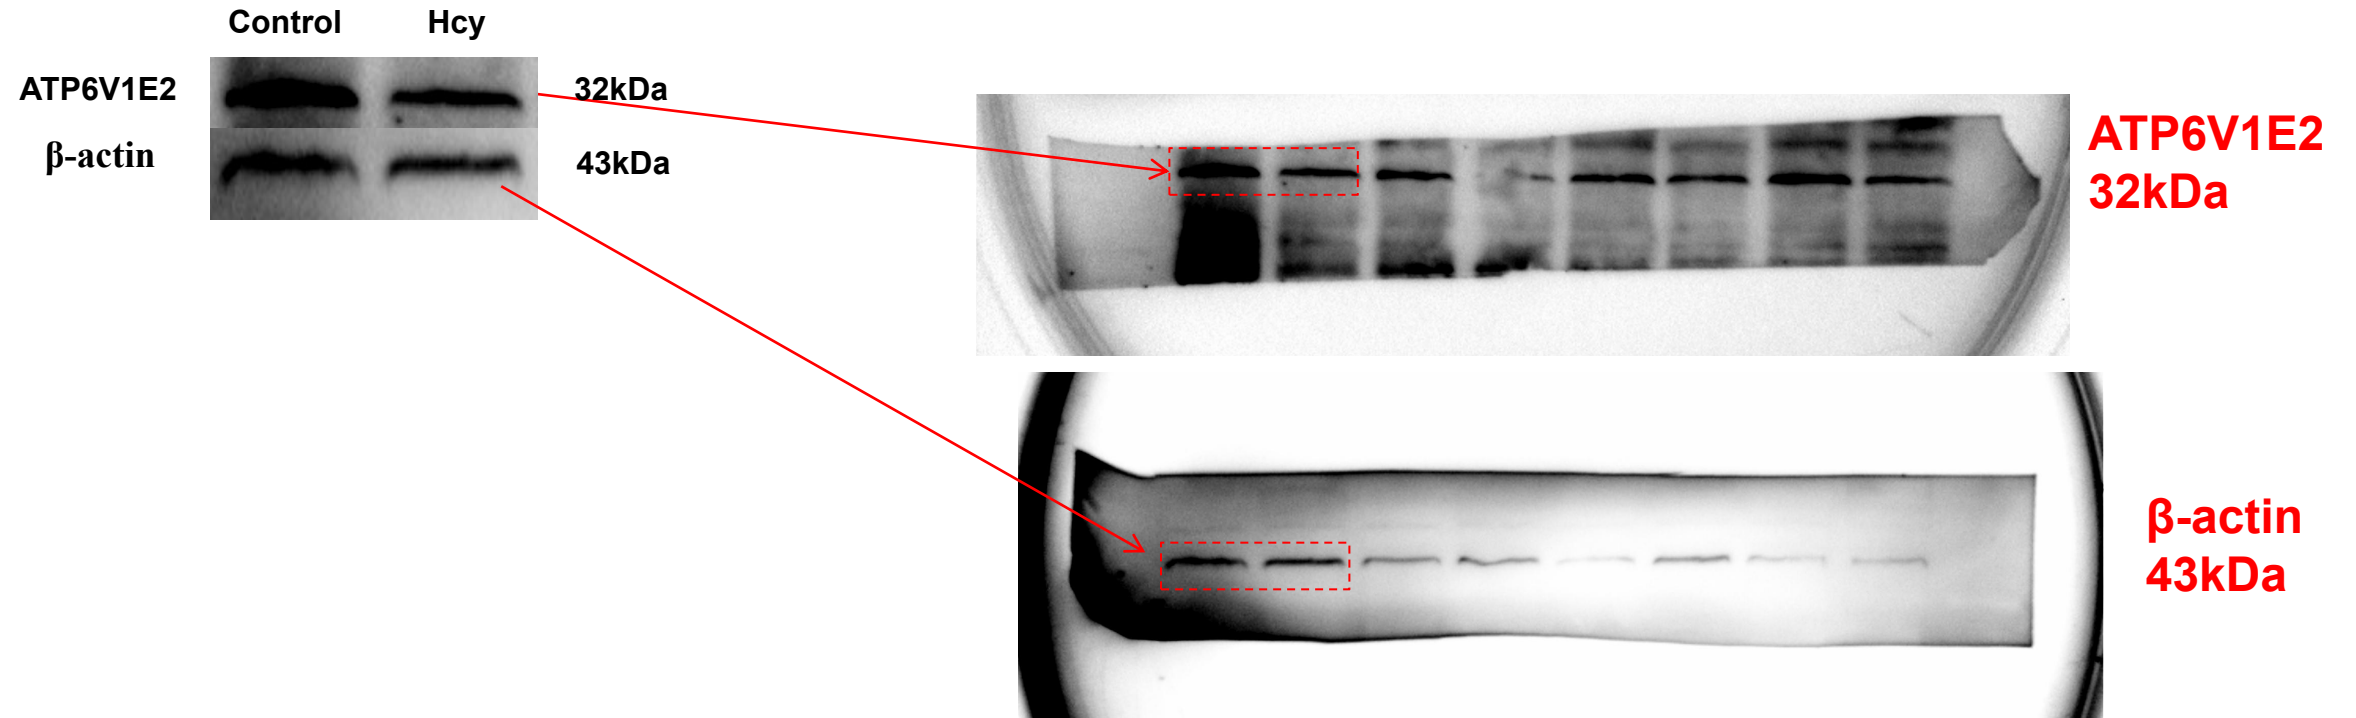

The samples derive from the same experiment or parallel experiments and that gels/blots were processed in parallel.
